# Supplementary material
Source: publisher site journal article supplement (https://www.spandidos-publications.com/7549/downloadSupplementary)
Supplement: Supplementary file 1 [file downloadSupplementary]

**Table SI.** Supplementary characteristics of included studies.

| First author, year | Affiliated unit                                                                                                                                                                                                                                                                                                                                                                                                             | Time period in which patients were included | (Refs.) |
|--------------------|-----------------------------------------------------------------------------------------------------------------------------------------------------------------------------------------------------------------------------------------------------------------------------------------------------------------------------------------------------------------------------------------------------------------------------|---------------------------------------------|---------|
| Xiang, 2014        | Department of Ultrasound, Second Affiliated Hospital, Zhejiang University College of Medicine, Hangzhou City, Zhejiang Province, China                                                                                                                                                                                                                                                                                      | From May 2012 to January 2014               | (13)    |
| Hong, 2017         | 1. Department of Ultrasound, Second Affiliated Hospital, Zhejiang University College of Medicine, Hangzhou City, Zhejiang Province, China; 2. Department of Surgery, Second Affiliated Hospital, Zhejiang University College of Medicine, Hangzhou City, Zhejiang Province, China; 3. Department of Pathology, Second Affiliated Hospital, Zhejiang University College of Medicine, Hangzhou City, Zhejiang Province, China | From January 2014 to September 2016         | (14)    |
| Zhan, 2019         | 1. Department of Ultrasound, Zhongshan Hospital, Fudan University, Shanghai, China; 2. Department of Ultrasound, Huadong Hospital, Fudan University, Shanghai, China                                                                                                                                                                                                                                                        | From March 2016 to November 2018            | (15)    |
| Chen, 2020         | Department of Ultrasound, Peking University First Hospital, Beijing, China                                                                                                                                                                                                                                                                                                                                                  | From February 2017 to January 2018          | (16)    |
| Wang, 2021         | 1. Medical Center of Ultrasound, Lanzhou University Second Hospital, Lanzhou, Gansu, P.R. China; 2. Department of Pathology, Lanzhou University Second Hospital, Lanzhou, Gansu, P.R. China                                                                                                                                                                                                                                 | From January 2018 to November 2020          | (17)    |
| Wei, 2021          | 1. Department of Interventional Ultrasound Medicine, China-Japan Friendship Hospital, Beijing, China; 2. Department of Pathology, China-Japan Friendship Hospital, Beijing, China; and 3. Department of                                                                                                                                                                                                                     | From November 2018 to March 2019            | (18)    |

|             |                                                                                                                                                                                                                                                                                                                           |                                     |      |
|-------------|---------------------------------------------------------------------------------------------------------------------------------------------------------------------------------------------------------------------------------------------------------------------------------------------------------------------------|-------------------------------------|------|
|             | Ultrasound, Tumor Hospital of Mu Dan Jiang City, Mudanjiang, China                                                                                                                                                                                                                                                        |                                     |      |
| Zhang, 2022 | 1. Department of General Surgery, Fujian Provincial Hospital, Fuzhou, China; 2. Department of Ultrasonography, Jingzhou City Women and Children Hospital, Jingzhou, China                                                                                                                                                 | From November 2015 to November 2020 | (19) |
| Xiao, 2023  | 1. Departments of Ultrasound and Head and Neck Surgery, Sun Yat-sen University Cancer Center, State Key Laboratory of Oncology in South China, Collaborative Innovation Center for Cancer Medicine, Guangzhou, PR China; 2. Department of Ultrasound, Sun Yat-sen University, Affiliated Hospital 8, Shenzhen, P.R. China | From October 2020 to October 2021   | (20) |
| Zhang, 2023 | 1. Departments of Ultrasound and Pathology, Division of First Medical Center, Chinese People's Liberation Army General Hospital, Beijing, China; 2. Department of Ultrasound, Division of Second Medical Center, Chinese People's Liberation Army General Hospital, Beijing, China                                        | From November 2020 to January 2021  | (21) |

---

**Table III.** Subgroup analysis based on study types.

| Items                              | Conventional US  | CEUS             | <i>P</i> value |
|------------------------------------|------------------|------------------|----------------|
| <b>Retrospective study (n = 3)</b> |                  |                  |                |
| Pooled sensitivity (95% CI)        | 0.74 (0.66-0.81) | 0.84 (0.77-0.89) | 0.041          |
| Pooled specificity (95% CI)        | 0.67 (0.56-0.76) | 0.71 (0.61-0.80) | 0.570          |
| AUC of SROC (SE)                   | 0.8089 (0.7437)  | 0.9550 (0.0317)  | 0.002          |
| <b>Prospective study (n = 6)</b>   |                  |                  |                |
| Pooled sensitivity (95% CI)        | 0.78 (0.74-0.81) | 0.85 (0.82-0.88) | 0.003          |
| Pooled specificity (95% CI)        | 0.74 (0.69-0.78) | 0.90 (0.86-0.92) | <0.001         |
| AUC of SROC (SE)                   | 0.8006 (0.0421)  | 0.9403 (0.0108)  | <0.001         |

US, ultrasound; CEUS, contrast-enhanced ultrasound; CI, confidence interval; AUC, area under curve; SROC, summary receiver operating characteristic; SE, standard error.

**Table SIII.** Summary DOR.

| First author, year | DOR (95% CI)        |                        | (Refs.) |
|--------------------|---------------------|------------------------|---------|
|                    | Conventional US     | CEUS                   |         |
| Xiang, 2014        | 6.27 (1.93-20.32)   | 8.10 (2.50-26.24)      | (13)    |
| Hong, 2017         | 18.00 (10.15-31.95) | 90.12 (40.63-199.86)   | (14)    |
| Zhan, 2019         | 6.43 (2.23-17.47)   | 118.33 (6.86-2039.94)  | (15)    |
| Chen, 2020         | 17.29 (4.42-67.57)  | 66.44 (12.19-362.94)   | (16)    |
| Wang, 2021         | 3.84 (1.77-8.31)    | 9.11 (3.87-21.45)      | (17)    |
| Wei, 2021          | 1.57 (0.26-9.47)    | 37.00 (5.08-269.67)    | (18)    |
| Zhang, 2022        | 4.86 (2.04-11.57)   | 11.79 (4.15-33.46)     | (19)    |
| Xiao, 2023         | 5.21 (2.40-11.32)   | 60.92 (21.86-169.79)   | (20)    |
| Zhang, 2023        | 16.57 (5.34-51.40)  | 315.00 (33.53-2959.37) | (21)    |
| Pooled             | 7.26 (4.38-12.03)   | 34.90 (15.06-80.85)    |         |
| P-value            | 0.102               |                        |         |

DOR, diagnostic odds ratio; US, ultrasound; CEUS, contrast-enhanced ultrasound; CI, confidence interval.

**Table SIV.** Robustness assessment.

---

| A, Pooled sensitivity (95% CI) |                  |                  |         |
|--------------------------------|------------------|------------------|---------|
| Omitted study                  | Conventional US  | CEUS             | (Refs.) |
| Xiang, 2014                    | 0.77 (0.73-0.81) | 0.85 (0.82-0.88) | (13)    |
| Hong, 2017                     | 0.73 (0.69-0.77) | 0.85 (0.81-0.88) | (14)    |
| Zhan, 2019                     | 0.76 (0.72-0.80) | 0.87 (0.84-0.89) | (15)    |
| Chen, 2020                     | 0.77 (0.73-0.80) | 0.85 (0.81-0.87) | (16)    |
| Wang, 2021                     | 0.77 (0.73-0.80) | 0.85 (0.82-0.88) | (17)    |
| Wei, 2021                      | 0.76 (0.72-0.80) | 0.84 (0.81-0.87) | (18)    |
| Zhang, 2022                    | 0.76 (0.72-0.80) | 0.83 (0.80-0.87) | (19)    |
| Xiao, 2023                     | 0.81 (0.77-0.84) | 0.85 (0.82-0.88) | (20)    |
| Zhang, 2023                    | 0.76 (0.73-0.80) | 0.84 (0.81-0.87) | (21)    |
| B, Pooled specificity (95% CI) |                  |                  |         |
| Omitted study                  | Conventional US  | CEUS             | (Refs.) |
| Xiang, 2014                    | 0.72 (0.68-0.76) | 0.86 (0.83-0.89) | (13)    |
| Hong, 2017                     | 0.71 (0.66-0.76) | 0.81 (0.76-0.85) | (14)    |
| Zhan, 2019                     | 0.73 (0.69-0.77) | 0.85 (0.81-0.88) | (15)    |

---

|                     |                  |                  |         |
|---------------------|------------------|------------------|---------|
| Chen, 2020          | 0.71 (0.67-0.76) | 0.85 (0.82-0.89) | (16)    |
| Wang, 2021          | 0.74 (0.70-0.78) | 0.88 (0.85-0.91) | (17)    |
| Wei, 2021           | 0.73 (0.69-0.77) | 0.86 (0.82-0.89) | (18)    |
| Zhang, 2022         | 0.73 (0.69-0.77) | 0.88 (0.85-0.91) | (19)    |
| Xiao, 2023          | 0.68 (0.63-0.73) | 0.84 (0.79-0.87) | (20)    |
| Zhang, 2023         | 0.87 (0.79-0.93) | 0.85 (0.81-0.88) | (21)    |
| C, AUC of SROC (SE) |                  |                  |         |
| Omitted study       | Conventional US  | CEUS             | (Refs.) |
| Xiang, 2014         | 0.8012 (0.0342)  | 0.9336 (0.0163)  | (13)    |
| Hong, 2017          | 0.7731 (0.0255)  | 0.9215 (0.0233)  | (14)    |
| Zhan, 2019          | 0.7983 (0.0343)  | 0.9284 (0.0195)  | (15)    |
| Chen, 2020          | 0.7890 (0.0341)  | 0.9236 (0.0202)  | (16)    |
| Wang, 2021          | 0.8076 (0.0315)  | 0.9341 (0.0159)  | (17)    |
| Wei, 2021           | 0.8025 (0.0290)  | 0.9233 (0.0185)  | (18)    |
| Zhang, 2022         | 0.8023 (0.0335)  | 0.9294 (0.0205)  | (19)    |
| Xiao, 2023          | 0.8489 (0.0324)  | 0.9281 (0.0222)  | (20)    |
| Zhang, 2023         | 0.7879 (0.0338)  | 0.9173 (0.0155)  | (21)    |

US, ultrasound; CEUS, contrast-enhanced ultrasound; CI, confidence interval; AUC, area under curve;

SROC, summary receiver operating characteristic; SE, standard error.
